# Supplementary material for: Host Dependence of Zooplankton-Associated Microbes and Their Ecological Implications in Freshwater Lakes
Source: MDPI journal article supplement (doi:10.3390/w13212949), 2021-10-20
Supplement: s1 [file s1]

Archive with 1 entries (1 files):
- water-1367074-supplementary.pdf
