# Supplementary material for: Host Dependence of Zooplankton-Associated Microbes and Their Ecological Implications in Freshwater Lakes
Source: MDPI journal article supplement (doi:10.3390/w13212949), 2021-10-20
Supplement: s1 [file s1 › water-1367074-supplementary.pdf]

## **Supporting Information**

### **Host Dependence of Zooplankton-associated Microbes and Their Ecological Implications in Freshwater Lakes**

Qianhong Wang<sup>a,b</sup>, Zheng Hao<sup>a,b</sup>, Ruirui Ding<sup>a,b</sup>, Huabing Li<sup>a</sup>, Xiangming Tang<sup>a</sup>,  
Feizhou Chen<sup>a,b\*</sup>

<sup>a</sup>State Key Laboratory of Lake Science and Environment, Nanjing Institute of Geography and Limnology, Chinese Academy of Sciences, Nanjing 210008, China

<sup>b</sup>University of Chinese Academy of Sciences, Beijing 100049, China

\*Corresponding author. Mail address: Nanjing Institute of Geography and Limnology, Chinese Academy of Sciences, 73 East Beijing Road, Nanjing 210008, China. Tel./fax: 0086-25-8688 2220. E-mail: feizhch@niglas.ac.cn (Feizhou Chen)

## **SUPPORTING MATERIALS and METHODS**

DNA was extracted using the ALFA-SEQ Advanced Water DNA Kit. DNA concentration and purity were measured by Thermo NanoDrop One. The primers 515F (5'-GTGCCAGCMGCCGCGGTAA-3') and 806R (5'-GGACTACHVGGGTWTCTAAT-3') were used to amplify V4 hypervariable regions of prokaryotic 16S rRNA genes. Polymerase chain reaction (PCR) system consisted of 2 × Premix Taq, 1 µL (10 µM) of each primer, 50 ng of DNA and finally added nuclease-free water constituting a total sample of 50 µL. The reactive conditions of PCR were as follows: (1) 94°C for 5min; (2) 30 cycles of: 94°C for 30 s, 52°C for 30 s; (3) 72°C for 30 s; (4) hold for 4°C. The PCR products of the same sample (3 replicates) were mixed, and the PCR instrument used was BioRad S1000 (Bio-Rad Laboratory, CA). The length and concentration of PCR products were detected by 1% agarose gel electrophoresis. Sample length in the normal range (290-310 bp) can be used for further experiments. Genetools analysis software (version 4.03.05.0, synGene) was used to compare the concentrations of PCR products. The used volume of each sample was calculated according to the equal mass principle, and the PCR products were then mixed. E.Z.N.A® Gel Extraction and gel recovery kit (Omega, USA) was used to recover PCR mixture, and the target DNA fragment was eluted by TE buffer. The database was built according to the NEBNext® Ultra™ II DNA Library Prep Kit for Illumina® (New England Biolabs, USA). The amplified library was sequenced by Illumina Nova 6000 (Guangdong Magigene Biotechnology Co., Ltd. Guangzhou, China).

## SUPPORTING TABLES

**Table S1.** Description of bacterial and environmental samples. FL, free-living bacteria; ZA, zooplankton-associated bacteria; WD, water depth; DO, dissolved oxygen; SD, Secchi depth; TN, total nitrogen; TP, total phosphorus; Lake Xiaoxingkai (XXK), Xihulu (XHL), Qianliujia (QLJ), Qingken (QK), Chagan (CG).

| Lake | Moina ZA<br>replicates | Calanoid ZA<br>replicates | FL<br>replicates | WD<br>(m) | pH   | DO<br>(mg/L) | SD<br>(cm) | TN<br>(mg/L) | TP<br>(mg/L) | Chl <i>a</i><br>(µg/L) |
|------|------------------------|---------------------------|------------------|-----------|------|--------------|------------|--------------|--------------|------------------------|
| XXK  | 2                      | 3                         | 1                | 2.6       | 8.94 | 9.93         | 16         | 0.95         | 0.05         | 12.2                   |
| XHL  | 2                      | 2                         | 1                | 1.7       | 9.09 | 8.67         | 22         | 1.28         | 0.07         | 20.7                   |
| QLJ  | 2                      | 2                         | 1                | 0.8       | 9.36 | 7.57         | 5          | 2.62         | 0.34         | 27.0                   |
| QK   | 2                      | 1                         | 1                | 2.0       | 9.21 | 9.35         | 15         | 2.22         | 0.13         | 22.5                   |
| CG   | 2                      | 2                         | 1                | 2.1       | 9.43 | 7.50         | 25         | 1.69         | 0.10         | 31.9                   |

**Table S2.** Taxonomic information of the top 10 OTUs in the *Moina*-, Calanoid-associated microbes and bacterioplankton sorted by their relative abundance or total reads of samples.

| Objects          | OTU                    | Phylum         | Abundance | Relative abundance |
|------------------|------------------------|----------------|-----------|--------------------|
| Bacterioplankton | <i>Micromonospora</i>  | Actinobacteria | 23517     | 15.10%             |
|                  | <i>Brevundimonas</i>   | Proteobacteria | 14445     | 9.42%              |
|                  | <i>Myxococcus</i>      | Proteobacteria | 13151     | 8.58%              |
|                  | <i>Acinetobacter</i>   | Proteobacteria | 6146      | 4.00%              |
|                  | <i>Streptomyces</i>    | Actinobacteria | 5453      | 3.56%              |
|                  | <i>Exiguobacterium</i> | Firmicutes     | 5315      | 3.47%              |
|                  | <i>Micromonospora</i>  | Actinobacteria | 4721      | 3.08%              |
|                  | <i>Micrococcus</i>     | Actinobacteria | 3960      | 2.58%              |
|                  | <i>Paracoccus</i>      | Proteobacteria | 3606      | 2.35%              |
|                  | <i>Brevibacillus</i>   | Firmicutes     | 3063      | 2.00%              |
| <i>Moina</i>     | <i>Brevibacterium</i>  | Actinobacteria | 151731    | 20.36%             |
|                  | Pseudomonadaceae       | Proteobacteria | 132854    | 17.83%             |
|                  | <i>Acinetobacter</i>   | Proteobacteria | 71750     | 9.63%              |
|                  | <i>Exiguobacterium</i> | Firmicutes     | 62734     | 8.42%              |
|                  | Bacillales             | Firmicutes     | 59271     | 7.95%              |

|           |                        |                |       |        |
|-----------|------------------------|----------------|-------|--------|
| Calanoids | <i>Rhodococcus</i>     | Actinobacteria | 59202 | 7.95%  |
|           | Aeromonadaceae         | Proteobacteria | 25453 | 3.41%  |
|           | <i>Exiguobacterium</i> | Firmicutes     | 11982 | 1.61%  |
|           | Bacillales             | Firmicutes     | 10461 | 1.40%  |
|           | Pseudoalteromonadaceae | Proteobacteria | 9606  | 1.29%  |
|           | Pseudomonadaceae       | Proteobacteria | 89173 | 12.29% |
|           | <i>Exiguobacterium</i> | unassigned     | 78769 | 10.86% |
|           | <i>Acinetobacter</i>   | Firmicutes     | 62834 | 8.66%  |
|           | Comamonadaceae         | Proteobacteria | 59980 | 8.27%  |
|           | Aeromonadaceae         | Proteobacteria | 30249 | 4.17%  |
|           | Methylobacteriaceae    | Proteobacteria | 23220 | 3.20%  |
|           | Pseudoalteromonadaceae | Proteobacteria | 18260 | 2.52%  |
|           | Enterobacteriaceae     | Proteobacteria | 18119 | 2.50%  |
|           | Rhizobiales            | Proteobacteria | 17065 | 2.35%  |
|           | Rhizobiales            | Proteobacteria | 15841 | 2.18%  |

**Table S3.** Co-occurrence network attributes of *Moina*- and Calanoid-associated microbes. FL, free-living bacteria; ZA, zooplankton-associated bacteria

| Objects         | Average degree | Average path length | Average clustering coefficient |
|-----------------|----------------|---------------------|--------------------------------|
| FL              | 7.224          | 3.071               | 0.755                          |
| <i>Moina</i> ZA | 61.379         | 1.754               | 0.831                          |
| Calanoid ZA     | 86.378         | 1.820               | 0.736                          |

**Table S4.** Species information of zooplankton in five freshwater lakes.

| Lakes       | <i>Moina</i>              | Calanoids                                              |
|-------------|---------------------------|--------------------------------------------------------|
| Qianliujia  | <i>Moina micrura</i>      | <i>Sinocalanus dorrii</i> , <i>Sinodiaptomus sarsi</i> |
| Qingken     | <i>Moina chankensis</i>   | <i>Sinocalanus dorrii</i>                              |
| Xihulu      | <i>Moina chankensis</i>   | <i>Sinocalanus dorrii</i>                              |
| Xiaoxingkai | <i>Moina chankensis</i>   | <i>Sinocalanus dorrii</i>                              |
| Chagan      | <i>Moina rectirostris</i> | <i>Sinocalanus dorrii</i>                              |

**Table S5.** Top 4 potential bacterial functions of zooplankton-associated bacteria.

| Potential bacterial functions       | Relative abundance |
|-------------------------------------|--------------------|
| RNA polymerase                      | 0.41%              |
| iron complex outermembrane receptor | 0.40%              |
| enoyl-CoA hydratase                 | 0.40%              |
| methyl-accepting chemotaxis protein | 0.32%              |

SUPPORTING FIGURES

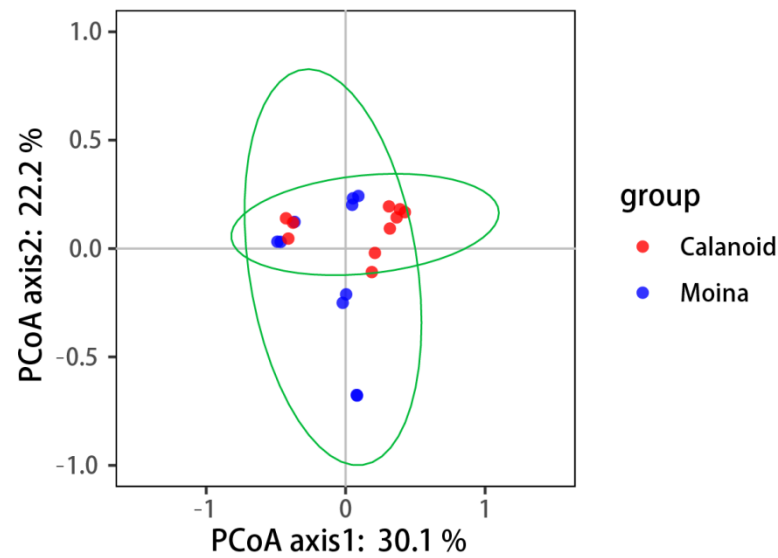

**Figure S1.** Divergence in two bacterial communities were presented by principal co-ordinates analysis (PCoA).

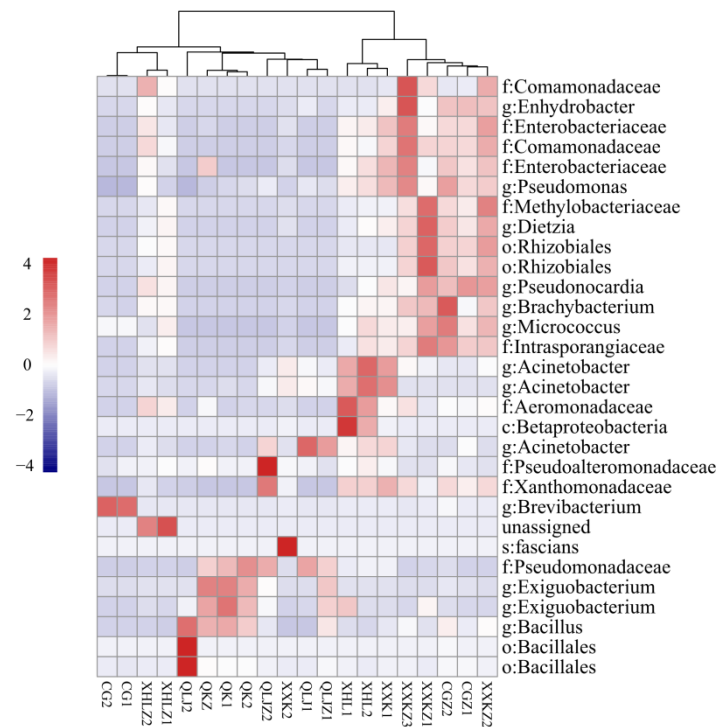

**Figure S2.** Heat map of top 30 OTUs among microbes associated with *Moina* spp. and Calanoids in five freshwater lakes. *Moina* samples are listed as XXK, QK, XHL, QLJ, CG and a following "Z" represents Calanoids. The highest taxonomy level was listed in the right.

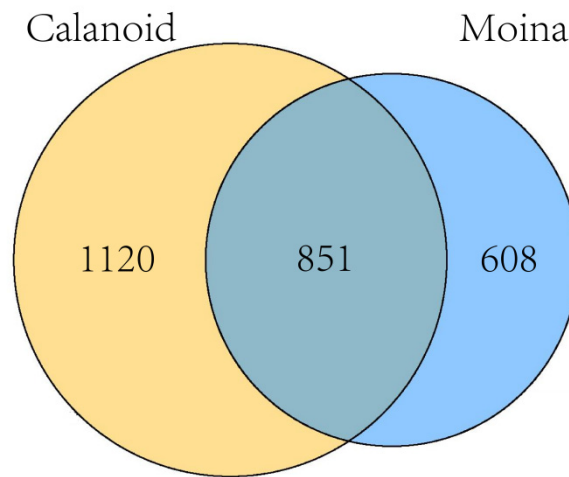

**Figure S3.** Shared OTUs between microbial groups associated with *Moina* and Calanoids in five freshwater lakes.

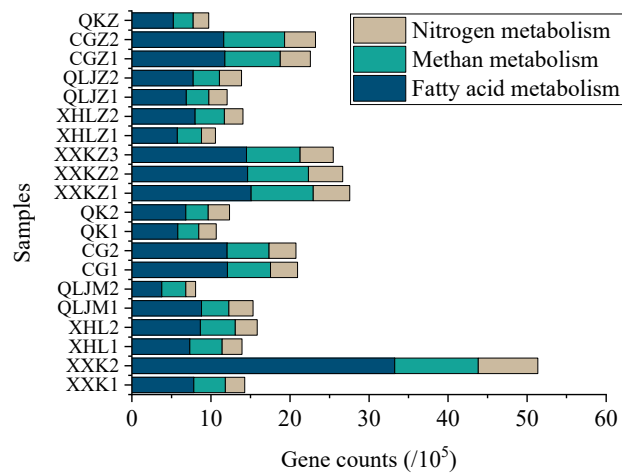

**Figure S4.** Nitrogen, methan and fatty metabolism gene counts across all samples associated with *Moina* (top panel) and Calanoids (lower panel) from five freshwater lakes are respectively shown. Lakes are listed as XXXK, QK, XHL, QLJ, CG and a following "Z" represents Calanoids.
